# Supplementary material for: 64Cu-ATSM Predicts Efficacy of Carbon Ion Radiotherapy Associated with Cellular Antioxidant Capacity
Source: MDPI journal article supplement (doi:10.3390/cancers13246159), 2021-12-07
Supplement: s1 [file s1]

**Supplementary Table S1.** Origin and histology of cancer cell lines used in this study.

| <b>Cell line</b> | <b>Origin</b> | <b>Histology</b>        |
|------------------|---------------|-------------------------|
| FaDu             | Head and neck | Squamous cell carcinoma |
| H1703            | Lung          | Squamous cell carcinoma |
| A549             | Lung          | Adenocarcinoma          |
| PC-9             | Lung          | Adenocarcinoma          |
| Ma24             | Lung          | Adenocarcinoma          |
| H1650            | Lung          | Adenocarcinoma          |
| H1299            | Lung          | Large cell carcinoma    |
| HCT15            | Colon         | Adenocarcinoma          |
| PC-3             | Prostate      | Adenocarcinoma          |
| U2OS             | Tibia         | Osteosarcoma            |

**Supplementary Table S2.** Antibodies used in this study.

| Target | Species | Clonality  | Dilution rate | Company                   | Product# |
|--------|---------|------------|---------------|---------------------------|----------|
| Nrf2   | Rabbit  | Monoclonal | 1:200         | Abcam                     | ab62352  |
| SOD2   | Rabbit  | Monoclonal | 1:1000        | Cell Signaling Technology | 13194    |
| TRX1   | Rabbit  | Polyclonal | 1:1000        | Cell Signaling Technology | 2285     |
| GAPDH  | Rabbit  | Monoclonal | 1:1000        | Cell Signaling Technology | 3683     |
