# Supplementary material for: 64Cu-ATSM Predicts Efficacy of Carbon Ion Radiotherapy Associated with Cellular Antioxidant Capacity
Source: MDPI journal article supplement (doi:10.3390/cancers13246159), 2021-12-07

Supplementary Figure S1

Nrf2

A549  
H1299  
H1650  
HCT15

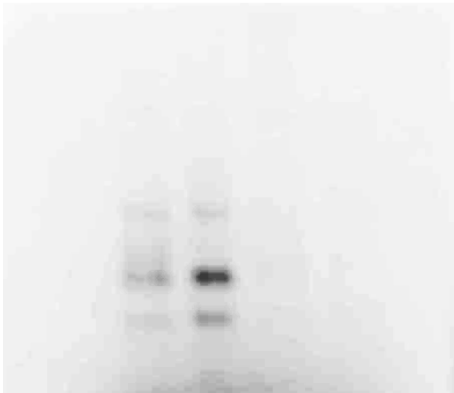

SOD2

A549  
H1299  
H1650  
HCT15

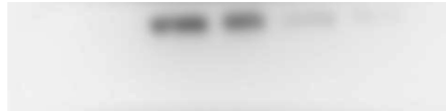

TRX1

A549  
H1299  
H1650  
HCT15

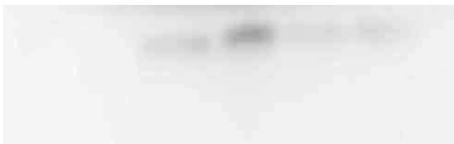

GAPDH

A549  
H1299  
H1650  
HCT15

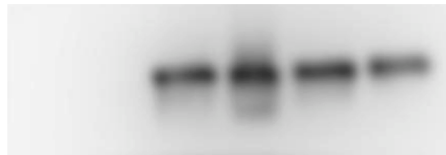

Supplementary Figure S2

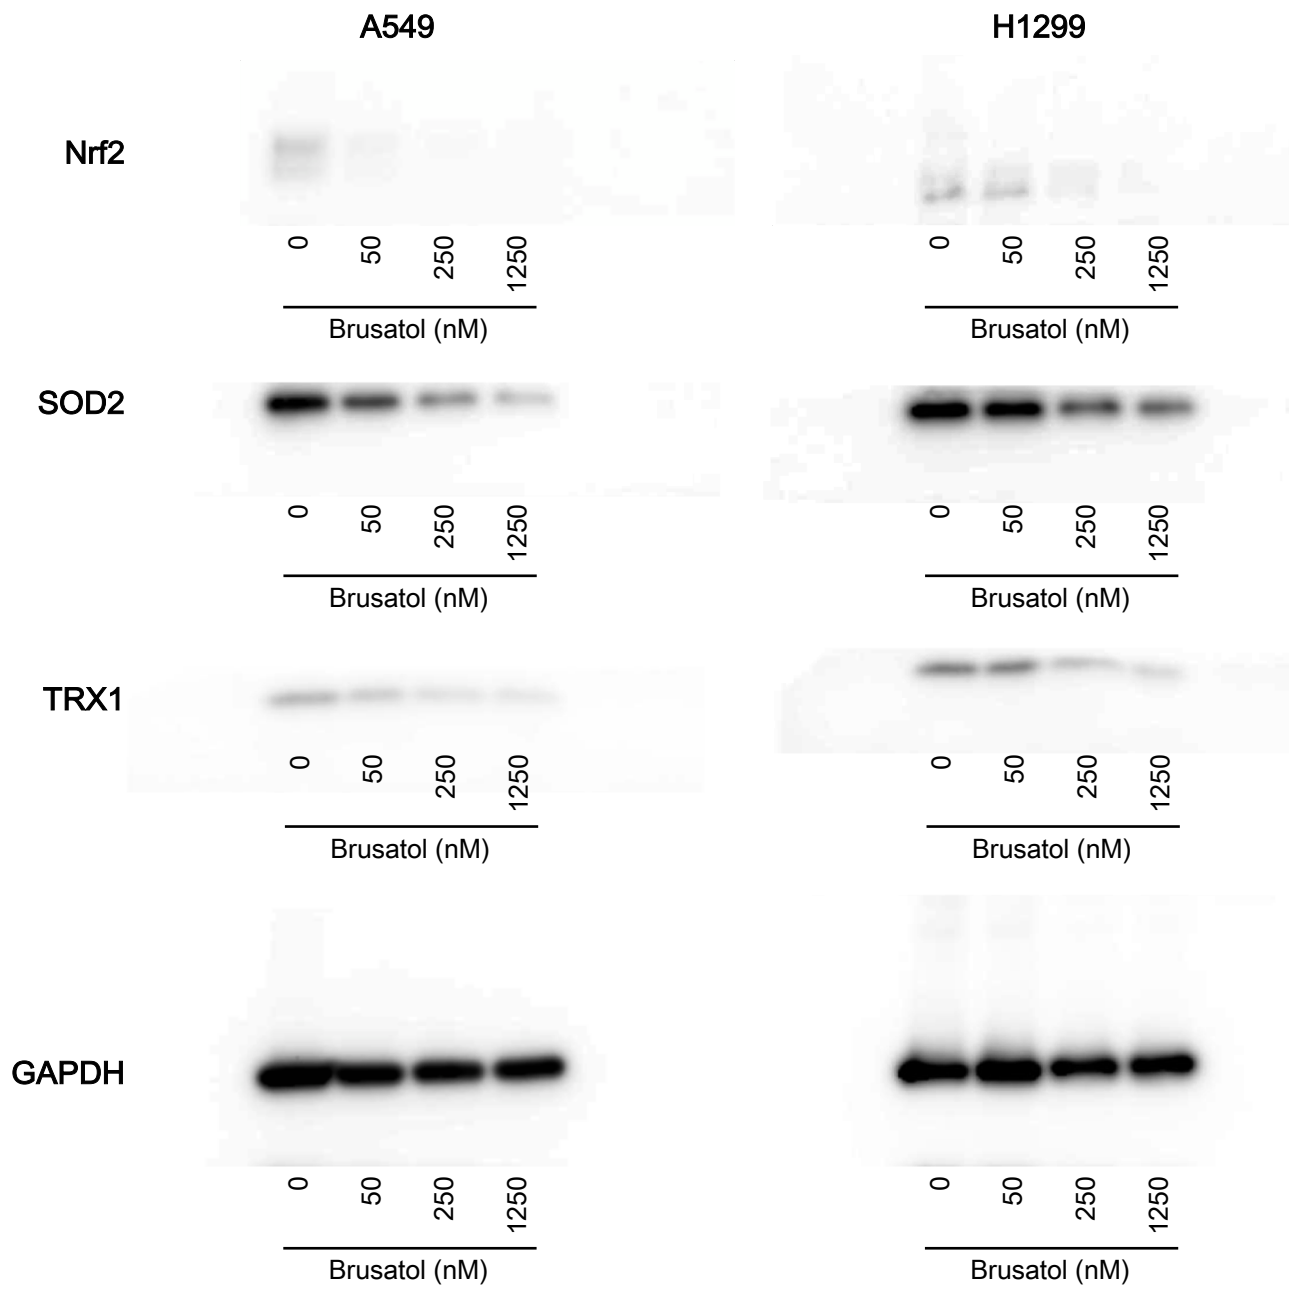

Supplementary Figure S3

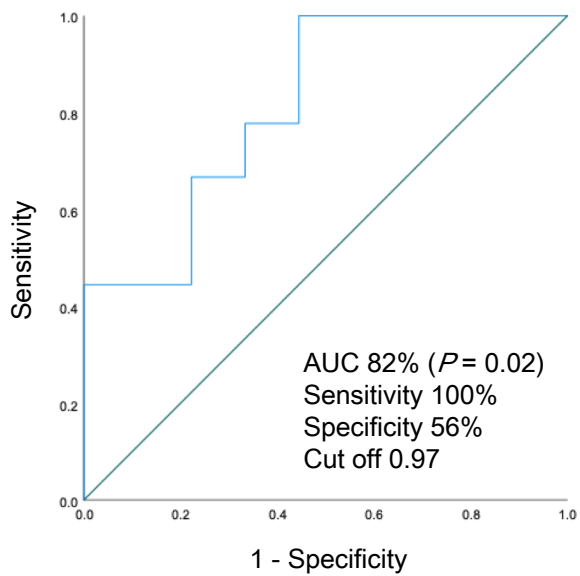

Supplementary Figure S4

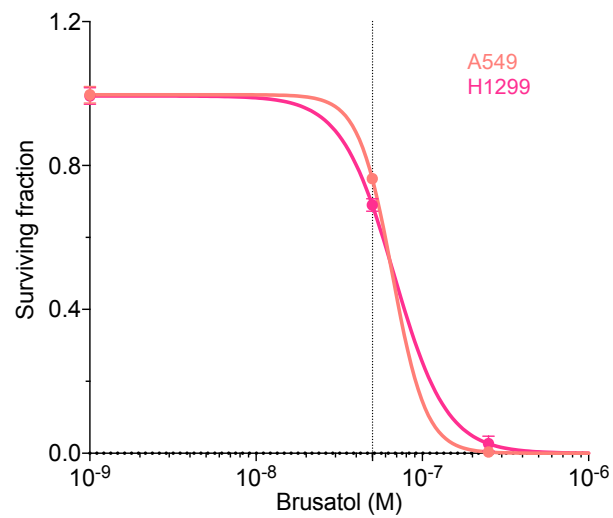

Supplement: s1 [file s1]
